# Supplementary material for: Glycyrrhizic Acid for COVID-19: Findings of Targeting Pivotal Inflammatory Pathways Triggered by SARS-CoV-2
Source: Front Pharmacol. 2021 Jun 9;12:631206. doi: 10.3389/fphar.2021.631206 (PMC8223069; doi:10.3389/fphar.2021.631206)
Supplement: SUPPLEMENTARY TABLE 4 — Protein-protein interaction analysis network of common targets. [file Table3.xls]

## Sheet: ClueGO Results
GOID	GOTerm	Ontology Source	Term PValue	Term PValue Corrected with Bonferroni step down	Group PValue	Group PValue Corrected with Bonferroni step down	GOLevels	GOGroups	% Associated Genes	Nr. Genes	Associated Genes Found
WP:170	Nuclear Receptors	WikiPathways_08.05.2020	2.42812e-07	7.01726e-05	2.42812e-07	3.15655e-06	[-1]	Group00	38.4615	15	[AR, ESR1, ESR2, NR1H2, NR1I3, NR3C1, PGR, PPARA, PPARG, RARG, RORA, RORC, RXRA, THRA, THRB]
WP:2355	Corticotropin-releasing hormone signaling pathway	WikiPathways_08.05.2020	7.24664e-05	0.0188413	7.24664e-05	0.000144933	[-1]	Group01	21.5054	20	[CAMK2A, CASP3, CYP11B1, GJA1, GSK3B, HSD3B2, HSP90AA1, IL2, MAPK1, MAPK14, MAPK3, MAPK8, NOS3, PARP1, PRKCA, PRKCB, PRKCD, PRKCQ, SULT2A1, TCF4]
WP:3888	VEGFA-VEGFR2 Signaling Pathway	WikiPathways_08.05.2020	1.19934e-06	0.000340613	1.19934e-06	1.19934e-05	[-1]	Group02	15.2968	67	[ACACB, ACKR3, ADRB2, ALB, ALDOA, ARF4, BCL2L1, BIN1, BMP2, CDC42, CYP2C8, DECR1, DUSP5, EEA1, EIF3D, EPHA2, FAM120A, FN1, GJA1, GRB2, GSK3B, HDAC9, HSP90AA1, ICAM1, ITGAV, JUN, KANK1, KDR, LDB2, LMAN1, MAPK1, MAPK12, MAPK14, MAPK3, MAPK8, MAPKAPK2, MDM2, MMP2, NOS3, NR4A3, PAK2, PDE4DIP, PDPK1, PGF, PIK3R1, PLA2G5, PLAU, PNP, PRKCA, PRKCB, PRKCD, PTGS2, PTK2B, PTPN1, PTPN11, RAB11A, RAB5A, RAC1,…
WP:4483	Relationship between inflammation, COX-2 and EGFR	WikiPathways_08.05.2020	2.08785e-06	0.000590861	2.08785e-06	1.87906e-05	[-1]	Group03	44	11	[EGFR, ESR1, MAPK1, MAPK3, NRAS, PTGER1, PTGER2, PTGER3, PTGER4, PTGS2, SRC]
WP:716	Vitamin A and Carotenoid Metabolism	WikiPathways_08.05.2020	0.000197278	0.0491223	0.000197278	0.000197278	[-1]	Group04	27.2727	12	[CRABP2, CYP2E1, DHRS3, MAPK1, RARG, RBP4, RDH10, RDH12, RDH8, RXRA, SDR16C5, SULT2B1]
WP:241	One Carbon Metabolism	WikiPathways_08.05.2020	2.47789e-05	0.00661597	2.47789e-05	9.91157e-05	[-1]	Group05	35.4839	11	[AHCY, ATIC, DHFR, DNMT1, DNMT3B, FOLH1, GART, MAT1A, MTHFD1, MTRR, TYMS]
WP:2431	Spinal Cord Injury	WikiPathways_08.05.2020	8.94101e-09	2.61971e-06	8.94101e-09	1.43056e-07	[-1]	Group06	25.8333	31	[AQP1, AQP4, CASP3, CCR2, CDC42, CDK2, EGFR, FKBP1A, GDNF, GFAP, GJA1, ICAM1, IL2, IL4, LILRB2, LTB4R, MAPK1, MAPK3, MIF, MMP12, MMP9, NOS1, NOS2, PDYN, PLA2G2A, PLA2G5, PRKCA, PTGS2, RAC1, RTN4R, SELP]
WP:247	Small Ligand GPCRs	WikiPathways_08.05.2020	3.38454e-09	9.95054e-07	3.38454e-09	5.75372e-08	[-1]	Group07	63.1579	12	[CNR1, PTAFR, PTGDR, PTGER1, PTGER2, PTGER3, PTGER4, PTGFR, PTGIR, S1PR1, S1PR3, S1PR4]
WP:176	Folate Metabolism	WikiPathways_08.05.2020	2.41228e-05	0.00646491	2.41228e-05	0.000120614	[-1]	Group08	24.6575	18	[AHCY, ALB, CAT, DHFR, F2, F7, GART, ICAM1, IL2, IL4, INS, INSR, MAT1A, MTHFD1, MTRR, NOS1, PLG, SOD2]
WP:2881	Estrogen Receptor Pathway	WikiPathways_08.05.2020	3.20399e-05	0.00852262	3.20399e-05	9.61198e-05	[-1]	Group09	53.8462	7	[CYP1A2, ESR1, JUN, PCK1, PDK4, PPARA, STAT3]
WP:2882	Nuclear Receptors Meta-Pathway	WikiPathways_08.05.2020	1.97831e-05	0.00534144	1.97831e-05	0.000118699	[-1]	Group10	15.528	50	[ACKR3, AMIGO2, APOA2, BLVRB, CBR1, CBR3, CES1, CUL1, CYP1A2, CYP2C9, CYP4A11, DNAJC15, EGFR, EPHA2, ESR1, FGFBP1, GSR, GSTA1, GSTM1, GSTP1, HGF, HSP90AA1, IL2, JUN, KEAP1, NR1H4, NR1I3, NR3C1, PCK1, PDE4B, PDK4, PPARA, PPARGC1A, PTGS2, PTPA, RXRA, SERPINA1, SERPINB2, SLC2A3, SLC2A4, SLC2A5, SLC39A5, SLC6A16, SLC6A4, SLC7A11, SRC, STAT3, STOM, SULT2A1, TGFBR2]
WP:382	MAPK Signaling Pathway	WikiPathways_08.05.2020	2.8625e-07	8.244e-05	2.8625e-07	3.435e-06	[-1]	Group11	18.4739	46	[CACNA1B, CACNA1E, CACNB1, CACNB2, CACNG2, CASP3, CDC42, DUSP6, EGFR, FASLG, FGF1, FGF10, FGF16, FGF17, FGF18, FGFR1, FGFR2, GRB2, HSPA8, JUN, MAP3K4, MAP3K7, MAP4K4, MAPK1, MAPK10, MAPK12, MAPK14, MAPK3, MAPK8, MAPKAPK2, NRAS, NTF3, NTRK2, PAK2, PPM1A, PPM1B, PPP5C, PRKACG, PRKCA, PRKCD, RAC1, RAC2, RAPGEF2, TAOK3, TGFBR1, TGFBR2]
WP:206	Fatty Acid Omega Oxidation	WikiPathways_08.05.2020	0.000103369	0.0264625	1.3634e-05	9.5438e-05	[-1]	Group12	46.6667	7	[ADH1B, ADH1C, ALDH2, CYP1A2, CYP2D6, CYP2E1, CYP4A11]
WP:3996	Ethanol effects on histone modifications	WikiPathways_08.05.2020	0.000146471	0.0367643	1.3634e-05	9.5438e-05	[-1]	Group12	32.2581	10	[ADH1B, ADH1C, AHCY, ALDH2, CYP2E1, DHFR, HDAC8, HDAC9, MAT1A, TYMS]
WP:3932	Focal Adhesion-PI3K-Akt-mTOR-signaling pathway	WikiPathways_08.05.2020	1.31651e-05	0.00362039	2.24436e-08	3.14211e-07	[-1]	Group13	15.8576	49	[CHRM2, COMP, EGFR, ELAVL1, EPHA2, FGF1, FGF10, FGF16, FGF17, FGF18, FGFR1, FGFR2, FN1, GRB2, GSK3B, HGF, HSP90AA1, IGF1, IGF1R, IL2, IL7R, INS, INSR, ITGA2B, ITGAL, ITGAV, KDR, KIT, LAMC2, LIPE, MAPK1, MAPK3, MDM2, MET, NOS1, NOS2, NOS3, NRAS, PDPK1, PGF, PIK3C2A, PIK3R1, PPARGC1A, PPP2CB, PPP2R5A, SLC2A3, SLC2A4, TSC2, VWF]
WP:4172	PI3K-Akt Signaling Pathway	WikiPathways_08.05.2020	4.8394e-07	0.000138891	2.24436e-08	3.14211e-07	[-1]	Group13	16.5217	57	[BCL2L1, CCND3, CDK2, CHRM2, COL6A5, COMP, EGFR, EPHA2, FASLG, FGF1, FGF10, FGF17, FGF18, FGFR1, FGFR2, FN1, GH1, GH2, GRB2, GSK3B, HGF, HSP90AA1, IGF1, IGF1R, IL2, IL4, IL7, IL7R, INS, INSR, ITGA2B, ITGAV, KDR, KIT, LAMC2, MAPK1, MAPK3, MDM2, MET, NOS3, NRAS, NTF3, NTRK2, PCK1, PDPK1, PGF, PIK3AP1, PIK3R1, PKN2, PPP2CB, PPP2R5A, PRKCA, RAC1, SYK, TLR2, TSC2, VWF]
WP:2806	Human Complement System	WikiPathways_08.05.2020	0.000180468	0.0451169	9.54294e-06	7.63435e-05	[-1]	Group14	20.202	20	[ALB, APCS, C1R, C1S, CD46, CFB, CFD, CFH, CR1, F10, ICAM1, ICAM2, ITGA2B, MBL2, PLG, PRKCA, SELE, SELP, TLR2, WAS]
WP:558	Complement and Coagulation Cascades	WikiPathways_08.05.2020	1.89772e-05	0.00514282	9.54294e-06	7.63435e-05	[-1]	Group14	27.1186	16	[C1R, C1S, C8G, CD46, CFB, CFD, CFH, CR1, F10, F2, F7, LMAN1, PLAU, PLG, SERPINA1, VWF]
WP:455	GPCRs, Class A Rhodopsin-like	WikiPathways_08.05.2020	8.99611e-07	0.000256389	8.99611e-07	9.89572e-06	[-1]	Group15	17.8295	46	[ACKR3, ADRA1A, ADRA1D, ADRA2A, ADRA2B, ADRA2C, ADRB1, ADRB2, ADRB3, CCR2, CCR4, CCR6, CCR9, CHRM2, CHRM5, CNR1, CXCR3, DRD1, DRD2, DRD3, F2RL1, GALR2, GPER1, GPR65, HTR1B, HTR2A, HTR2B, HTR2C, HTR5A, HTR6, HTR7, LTB4R, NPFFR1, NPY2R, OR2J3, OR6A2, P2RY10, PTAFR, PTGDR, PTGDR2, PTGER1, PTGER2, PTGER3, PTGER4, PTGFR, PTGIR]
WP:58	Monoamine GPCRs	WikiPathways_08.05.2020	4.96125e-14	1.47349e-11	8.99611e-07	9.89572e-06	[-1]	Group15	60.6061	20	[ADRA1A, ADRA1D, ADRA2A, ADRA2B, ADRA2C, ADRB1, ADRB2, ADRB3, CHRM2, CHRM5, DRD1, DRD2, DRD3, HTR1B, HTR2A, HTR2B, HTR2C, HTR5A, HTR6, HTR7]
WP:4719	Eicosanoid metabolism via Cyclo Oxygenases (COX)	WikiPathways_08.05.2020	0.000107216	0.02734	4.87737e-11	9.26699e-10	[-1]	Group16	33.3333	10	[AKR1B1, CYP4A11, HPGD, PLA2G5, PTGDR, PTGDR2, PTGFR, PTGIR, PTGS2, TBXAS1]
WP:98	Prostaglandin Synthesis and Regulation	WikiPathways_08.05.2020	1.09416e-11	3.2387e-09	4.87737e-11	9.26699e-10	[-1]	Group16	46.6667	21	[AKR1B1, AKR1C1, AKR1C2, AKR1C3, ANXA5, CBR1, HPGD, HPGDS, HSD11B1, HSD11B2, PPARG, PPARGC1A, PTGDR, PTGER1, PTGER2, PTGER3, PTGER4, PTGFR, PTGIR, PTGS2, TBXAS1]
WP:2037	Prolactin Signaling Pathway	WikiPathways_08.05.2020	1.16147e-05	0.00320567	1.39748e-08	2.09622e-07	[-1]	Group17	25	19	[CASP3, CTSD, GRB2, GSK3B, JUN, MAPK1, MAPK14, MAPK3, MAPK8, NOS2, PIK3R1, PPIA, PTPN1, PTPN11, RAC1, SOCS3, SRC, STAT3, ZAP70]
WP:2261	Signaling Pathways in Glioblastoma	WikiPathways_08.05.2020	8.16204e-07	0.000233434	1.39748e-08	2.09622e-07	[-1]	Group17	26.506	22	[CDK2, CDKN2A, EGFR, FGFR1, FGFR2, GRB2, IGF1R, MAPK1, MAPK3, MDM2, MET, NRAS, PDPK1, PIK3C2A, PIK3R1, PRKCA, PRKCB, PRKCD, PRKCH, PRKCQ, SRC, TSC2]
WP:23	B Cell Receptor Signaling Pathway	WikiPathways_08.05.2020	1.56277e-05	0.00425072	1.39748e-08	2.09622e-07	[-1]	Group17	22.449	22	[CAMK2A, CD22, CD79A, CDC42, GRB2, GSK3A, GSK3B, JUN, MAP3K7, MAPK1, MAPK14, MAPK8, PDPK1, PIK3AP1, PIK3R1, PRKCB, PRKCD, PTPN11, PTPRC, RAC1, RAC2, SYK]
WP:2374	Oncostatin M Signaling Pathway	WikiPathways_08.05.2020	4.71491e-08	1.37204e-05	1.39748e-08	2.09622e-07	[-1]	Group17	31.8182	21	[CASP3, CASP7, CDK2, GRB2, MAPK1, MAPK14, MAPK3, MAPK8, MMP13, MMP3, PIK3R1, PRKCA, PRKCB, PRKCD, PRKCH, PTK2B, PTPN11, SOCS3, SRC, STAT3, TIMP3]
WP:4205	MET in type 1 papillary renal cell carcinoma	WikiPathways_08.05.2020	7.82419e-05	0.0201864	1.39748e-08	2.09622e-07	[-1]	Group17	25.4237	15	[CDC42, GRB2, HGF, JUN, MAPK1, MAPK3, MAPK8, MET, NRAS, PAK2, PIK3R1, PTPN11, RAC1, SRC, STAT3]
WP:4223	Ras Signaling	WikiPathways_08.05.2020	5.37628e-06	0.00151073	1.39748e-08	2.09622e-07	[-1]	Group17	18.8172	35	[BCL2L1, CDC42, EGFR, EPHA2, FASLG, FGFR1, FGFR2, GRB2, HTR7, IGF1R, INSR, KDR, KIT, MAPK1, MAPK10, MAPK3, MAPK8, MET, NRAS, NTRK2, PAK2, PIK3R1, PLA2G2A, PLA2G3, PLA2G5, PLAAT3, PLCE1, PRKACG, PRKCA, PRKCB, PTPN11, RAB5A, RAC1, RAC2, ZAP70]
WP:4540	Pathways Regulating Hippo Signaling	WikiPathways_08.05.2020	5.95451e-05	0.0156604	1.39748e-08	2.09622e-07	[-1]	Group17	21.2121	21	[CDC42, CDH12, CDH22, EGFR, EPHA2, FGFR1, FGFR2, IGF1R, INSR, KDR, KIT, MET, NTRK2, PRKAB1, PRKACG, PRKCA, PRKCB, PRKCD, PRKCH, PRKCQ, RAC1]
WP:481	Insulin Signaling	WikiPathways_08.05.2020	1.16455e-07	3.3772e-05	1.39748e-08	2.09622e-07	[-1]	Group17	21.7391	35	[ARF1, CYTH3, GRB2, GSK3A, GSK3B, IGF1R, INSR, JUN, LIPE, MAP3K4, MAP3K7, MAP4K4, MAPK1, MAPK10, MAPK12, MAPK14, MAPK3, MAPK8, PDPK1, PIK3C2A, PIK3R1, PRKCA, PRKCB, PRKCD, PRKCH, PRKCQ, PTPN1, PTPN11, RAC1, RAC2, REG1A, RHOJ, SLC2A4, SOCS3, TSC2]
WP:2036	TNF related weak inducer of apoptosis (TWEAK) Signaling Pathway	WikiPathways_08.05.2020	0.00012099	0.0307315	8.16309e-11	1.46936e-09	[-1]	Group18	28.5714	12	[CASP3, CASP7, CASP8, GSK3B, JUN, MAP3K7, MAPK1, MAPK14, MAPK3, MAPK8, MMP9, RAC1]
WP:2037	Prolactin Signaling Pathway	WikiPathways_08.05.2020	1.16147e-05	0.00320567	8.16309e-11	1.46936e-09	[-1]	Group18	25	19	[CASP3, CTSD, GRB2, GSK3B, JUN, MAPK1, MAPK14, MAPK3, MAPK8, NOS2, PIK3R1, PPIA, PTPN1, PTPN11, RAC1, SOCS3, SRC, STAT3, ZAP70]
WP:2324	AGE/RAGE pathway	WikiPathways_08.05.2020	1.43682e-09	4.23863e-07	8.16309e-11	1.46936e-09	[-1]	Group18	34.8485	23	[CASP3, CASP8, CDC42, EGFR, INS, INSR, JUN, MAPK1, MAPK14, MAPK3, MAPK8, MMP13, MMP2, MMP7, MMP9, NOS2, NOS3, PRKCA, PRKCB, PRKCD, RAC1, SRC, STAT3]
WP:2795	Cardiac Hypertrophic Response	WikiPathways_08.05.2020	5.07106e-05	0.0133876	8.16309e-11	1.46936e-09	[-1]	Group18	26.3158	15	[CDK7, FGFR2, GSK3B, HDAC9, IGF1, MAP3K7, MAPK1, MAPK14, MAPK3, MAPK8, PDPK1, PLA2G2A, PRKCA, RAC1, TGFBR1]
WP:314	Fas Ligand (FasL) pathway and Stress induction of Heat Shock Proteins (HSP) regulation	WikiPathways_08.05.2020	4.28802e-05	0.0113632	8.16309e-11	1.46936e-09	[-1]	Group18	29.5455	13	[CASP3, CASP6, CASP7, CASP8, FASLG, JUN, MAP3K7, MAPK8, MAPKAPK2, NFX1, PAK2, PARP1, PRKDC]
WP:3646	Hepatitis C and Hepatocellular Carcinoma	WikiPathways_08.05.2020	9.03322e-06	0.00252027	8.16309e-11	1.46936e-09	[-1]	Group18	30	15	[BCL2L1, CASP3, CASP7, FASLG, GRB2, JUN, MAPK14, MAPK3, MAPK8, NOS2, PTGS2, PTPN11, RAC1, STAT3, TGFBR1]
WP:4298	Viral Acute Myocarditis	WikiPathways_08.05.2020	2.18791e-05	0.00588548	8.16309e-11	1.46936e-09	[-1]	Group18	23.2558	20	[BCL2L1, CASP1, CASP3, CASP6, CASP7, CASP8, GSK3B, IL2, ITGAL, MAPK1, MAPK3, MMP9, NOS1, PARP1, PIK3R1, RAC2, SGCD, SGCG, SRC, STAT3]
WP:4747	Netrin-UNC5B signaling Pathway	WikiPathways_08.05.2020	1.53362e-05	0.00420211	8.16309e-11	1.46936e-09	[-1]	Group18	28.8462	15	[CASP3, DAPK1, ICAM1, JUN, KDR, MAPK1, MAPK14, MAPK3, PRKCA, PTK2B, PTPA, PTPN11, RAC1, SELE, SRC]
WP:127	IL-5 Signaling Pathway	WikiPathways_08.05.2020	7.15149e-05	0.0186654	8.08714e-13	1.61743e-11	[-1]	Group19	30	12	[CSF2RB, GRB2, GSK3A, GSK3B, IL2, JUN, MAPK1, MAPK3, PIK3R1, PTPN11, STAT3, SYK]
WP:2034	Leptin signaling pathway	WikiPathways_08.05.2020	2.91672e-06	0.000822514	8.08714e-13	1.61743e-11	[-1]	Group19	26.3158	20	[ACACB, BCL2L1, CDC42, ESR1, GRB2, GSK3A, GSK3B, MAPK1, MAPK14, MAPK3, MAPK8, NOS3, PDE3B, PIK3R1, PTPN1, PTPN11, RAC1, SOCS3, SRC, STAT3]
WP:2036	TNF related weak inducer of apoptosis (TWEAK) Signaling Pathway	WikiPathways_08.05.2020	0.00012099	0.0307315	8.08714e-13	1.61743e-11	[-1]	Group19	28.5714	12	[CASP3, CASP7, CASP8, GSK3B, JUN, MAP3K7, MAPK1, MAPK14, MAPK3, MAPK8, MMP9, RAC1]
WP:2037	Prolactin Signaling Pathway	WikiPathways_08.05.2020	1.16147e-05	0.00320567	8.08714e-13	1.61743e-11	[-1]	Group19	25	19	[CASP3, CTSD, GRB2, GSK3B, JUN, MAPK1, MAPK14, MAPK3, MAPK8, NOS2, PIK3R1, PPIA, PTPN1, PTPN11, RAC1, SOCS3, SRC, STAT3, ZAP70]
WP:205	IL-7 Signaling Pathway	WikiPathways_08.05.2020	0.000121038	0.0306225	8.08714e-13	1.61743e-11	[-1]	Group19	36	9	[BCL2L1, GSK3B, IL7, IL7R, MAPK1, MAPK3, PIK3R1, PTK2B, STAT3]
WP:2261	Signaling Pathways in Glioblastoma	WikiPathways_08.05.2020	8.16204e-07	0.000233434	8.08714e-13	1.61743e-11	[-1]	Group19	26.506	22	[CDK2, CDKN2A, EGFR, FGFR1, FGFR2, GRB2, IGF1R, MAPK1, MAPK3, MDM2, MET, NRAS, PDPK1, PIK3C2A, PIK3R1, PRKCA, PRKCB, PRKCD, PRKCH, PRKCQ, SRC, TSC2]
WP:23	B Cell Receptor Signaling Pathway	WikiPathways_08.05.2020	1.56277e-05	0.00425072	8.08714e-13	1.61743e-11	[-1]	Group19	22.449	22	[CAMK2A, CD22, CD79A, CDC42, GRB2, GSK3A, GSK3B, JUN, MAP3K7, MAPK1, MAPK14, MAPK8, PDPK1, PIK3AP1, PIK3R1, PRKCB, PRKCD, PTPN11, PTPRC, RAC1, RAC2, SYK]
WP:2324	AGE/RAGE pathway	WikiPathways_08.05.2020	1.43682e-09	4.23863e-07	8.08714e-13	1.61743e-11	[-1]	Group19	34.8485	23	[CASP3, CASP8, CDC42, EGFR, INS, INSR, JUN, MAPK1, MAPK14, MAPK3, MAPK8, MMP13, MMP2, MMP7, MMP9, NOS2, NOS3, PRKCA, PRKCB, PRKCD, RAC1, SRC, STAT3]
WP:2374	Oncostatin M Signaling Pathway	WikiPathways_08.05.2020	4.71491e-08	1.37204e-05	8.08714e-13	1.61743e-11	[-1]	Group19	31.8182	21	[CASP3, CASP7, CDK2, GRB2, MAPK1, MAPK14, MAPK3, MAPK8, MMP13, MMP3, PIK3R1, PRKCA, PRKCB, PRKCD, PRKCH, PTK2B, PTPN11, SOCS3, SRC, STAT3, TIMP3]
WP:2380	Brain-Derived Neurotrophic Factor (BDNF) signaling pathway	WikiPathways_08.05.2020	9.947e-06	0.00276527	8.08714e-13	1.61743e-11	[-1]	Group19	20.1389	29	[ACACB, BMP2, CAMK2A, CASP3, CDC42, CNR1, CSNK2A1, GRB2, GSK3B, JUN, KCNA3, MAPK1, MAPK10, MAPK14, MAPK3, MAPK8, NCAM1, NTF3, NTRK2, PDPK1, PIK3R1, PRKCD, PTK2B, PTPN11, RAC1, SRC, STAT3, SYN1, TSC2]
WP:244	Alpha 6 Beta 4 signaling pathway	WikiPathways_08.05.2020	8.93192e-05	0.022955	8.08714e-13	1.61743e-11	[-1]	Group19	31.4286	11	[GRB2, LAMC2, MAPK1, MAPK14, MAPK3, PIK3R1, PRKCA, PRKCD, PTPN11, RAC1, SRC]
WP:2643	Nanoparticle-mediated activation of receptor signaling	WikiPathways_08.05.2020	7.72399e-05	0.0200051	8.08714e-13	1.61743e-11	[-1]	Group19	34.4828	10	[EGFR, FN1, GRB2, MAPK1, MAPK10, MAPK12, MAPK14, MAPK8, NRAS, SRC]
WP:286	IL-3 Signaling Pathway	WikiPathways_08.05.2020	0.000146224	0.0368485	8.08714e-13	1.61743e-11	[-1]	Group19	26.5306	13	[BCL2L1, CSF2RB, GRB2, HCK, JUN, MAPK1, MAPK3, MAPK8, PIK3R1, PTPN11, SRC, STAT3, SYK]
WP:313	Signaling of Hepatocyte Growth Factor Receptor	WikiPathways_08.05.2020	6.62213e-05	0.01735	8.08714e-13	1.61743e-11	[-1]	Group19	32.3529	11	[GRB2, HGF, JUN, MAPK1, MAPK3, MAPK8, MET, PTK2B, PTPN11, SRC, STAT3]
WP:3303	RAC1/PAK1/p38/MMP2 Pathway	WikiPathways_08.05.2020	1.0418e-05	0.00288578	8.08714e-13	1.61743e-11	[-1]	Group19	26.087	18	[CASP7, EGFR, FN1, GRB2, MAPK1, MAPK12, MAPK14, MAPK3, MAPK8, MMP2, NOS1, NOS2, NRAS, PIK3R1, PTPN11, RAC1, SRC, STAT3]
WP:364	IL-6 signaling pathway	WikiPathways_08.05.2020	6.20266e-06	0.00173674	8.08714e-13	1.61743e-11	[-1]	Group19	32.5581	14	[BCL2L1, GRB2, GSK3B, HCK, MAP3K7, MAPK1, MAPK3, PIK3R1, PRKCD, PTPN11, RAC1, SOCS3, STAT3, VIP]
WP:3646	Hepatitis C and Hepatocellular Carcinoma	WikiPathways_08.05.2020	9.03322e-06	0.00252027	8.08714e-13	1.61743e-11	[-1]	Group19	30	15	[BCL2L1, CASP3, CASP7, FASLG, GRB2, JUN, MAPK14, MAPK3, MAPK8, NOS2, PTGS2, PTPN11, RAC1, STAT3, TGFBR1]
WP:4205	MET in type 1 papillary renal cell carcinoma	WikiPathways_08.05.2020	7.82419e-05	0.0201864	8.08714e-13	1.61743e-11	[-1]	Group19	25.4237	15	[CDC42, GRB2, HGF, JUN, MAPK1, MAPK3, MAPK8, MET, NRAS, PAK2, PIK3R1, PTPN11, RAC1, SRC, STAT3]
WP:4223	Ras Signaling	WikiPathways_08.05.2020	5.37628e-06	0.00151073	8.08714e-13	1.61743e-11	[-1]	Group19	18.8172	35	[BCL2L1, CDC42, EGFR, EPHA2, FASLG, FGFR1, FGFR2, GRB2, HTR7, IGF1R, INSR, KDR, KIT, MAPK1, MAPK10, MAPK3, MAPK8, MET, NRAS, NTRK2, PAK2, PIK3R1, PLA2G2A, PLA2G3, PLA2G5, PLAAT3, PLCE1, PRKACG, PRKCA, PRKCB, PTPN11, RAB5A, RAC1, RAC2, ZAP70]
WP:4659	Gastrin Signaling Pathway	WikiPathways_08.05.2020	9.76981e-09	2.85278e-06	8.08714e-13	1.61743e-11	[-1]	Group19	26.3158	30	[BCL2L1, BMP2, CASP3, CDC42, CDKN2A, EGFR, ELAVL1, GRB2, GSK3B, IL2, JUN, KIT, MAPK1, MAPK14, MAPK3, MAPK8, MMP7, PIK3R1, PPARG, PRKCA, PRKCD, PRKCH, PRKCQ, PTGS2, PTPN11, RAC1, SERPINB2, SRC, STAT3, TCF4]
WP:4747	Netrin-UNC5B signaling Pathway	WikiPathways_08.05.2020	1.53362e-05	0.00420211	8.08714e-13	1.61743e-11	[-1]	Group19	28.8462	15	[CASP3, DAPK1, ICAM1, JUN, KDR, MAPK1, MAPK14, MAPK3, PRKCA, PTK2B, PTPA, PTPN11, RAC1, SELE, SRC]
WP:481	Insulin Signaling	WikiPathways_08.05.2020	1.16455e-07	3.3772e-05	8.08714e-13	1.61743e-11	[-1]	Group19	21.7391	35	[ARF1, CYTH3, GRB2, GSK3A, GSK3B, IGF1R, INSR, JUN, LIPE, MAP3K4, MAP3K7, MAP4K4, MAPK1, MAPK10, MAPK12, MAPK14, MAPK3, MAPK8, PDPK1, PIK3C2A, PIK3R1, PRKCA, PRKCB, PRKCD, PRKCH, PRKCQ, PTPN1, PTPN11, RAC1, RAC2, REG1A, RHOJ, SLC2A4, SOCS3, TSC2]
WP:69	T-Cell antigen Receptor (TCR) Signaling Pathway	WikiPathways_08.05.2020	1.5532e-05	0.00424023	8.08714e-13	1.61743e-11	[-1]	Group19	23.0769	21	[CD3D, CDC42, GATA3, GRB2, ICOS, ITK, JUN, MAP3K7, MAPK1, MAPK14, MAPK3, MAPK8, PDPK1, PIK3R1, PRKCD, PRKCQ, PSTPIP1, PTK2B, PTPN11, WAS, ZAP70]
