# Supplementary material for: Glycyrrhizic Acid for COVID-19: Findings of Targeting Pivotal Inflammatory Pathways Triggered by SARS-CoV-2
Source: Front Pharmacol. 2021 Jun 9;12:631206. doi: 10.3389/fphar.2021.631206 (PMC8223069; doi:10.3389/fphar.2021.631206)
Supplement: SUPPLEMENTARY TABLE 6 — Pathway activity ranking. [file Table4.xlsx]

## Sheet: Sheet1
Top 30 in network string_interactions ranked by Degree method
Rank	Name	Score
1	PPARG	26
2	MMP9	24
3	SOCS3	22
4	PPARGC1A	20
4	TLR2	20
4	ICAM1	20
7	CREBBP	18
7	CAT	18
9	RBX1	16
9	TCEB1	16
9	SOD2	16
9	C3	16
13	CDA	14
13	CUL2	14
13	TCEB2	14
13	CUL5	14
13	VHL	14
18	ITGB2	12
18	ESRRA	12
18	TIMP1	12
21	SOD1	10
21	NCOA1	10
21	NCOA2	10
24	PDK4	8
24	MAOB	8
26	CD46	6
26	ITGAL	6
26	CFB	6
26	MMP13	6
30	CFH	4
30	TYMP	4
